# Supplementary material for: Multiplex Cytological Profiling Assay to Measure Diverse Cellular States
Source: PubMed Central journal article supplement (PMC3847047; doi:10.1371/journal.pone.0080999), 2013-12-02

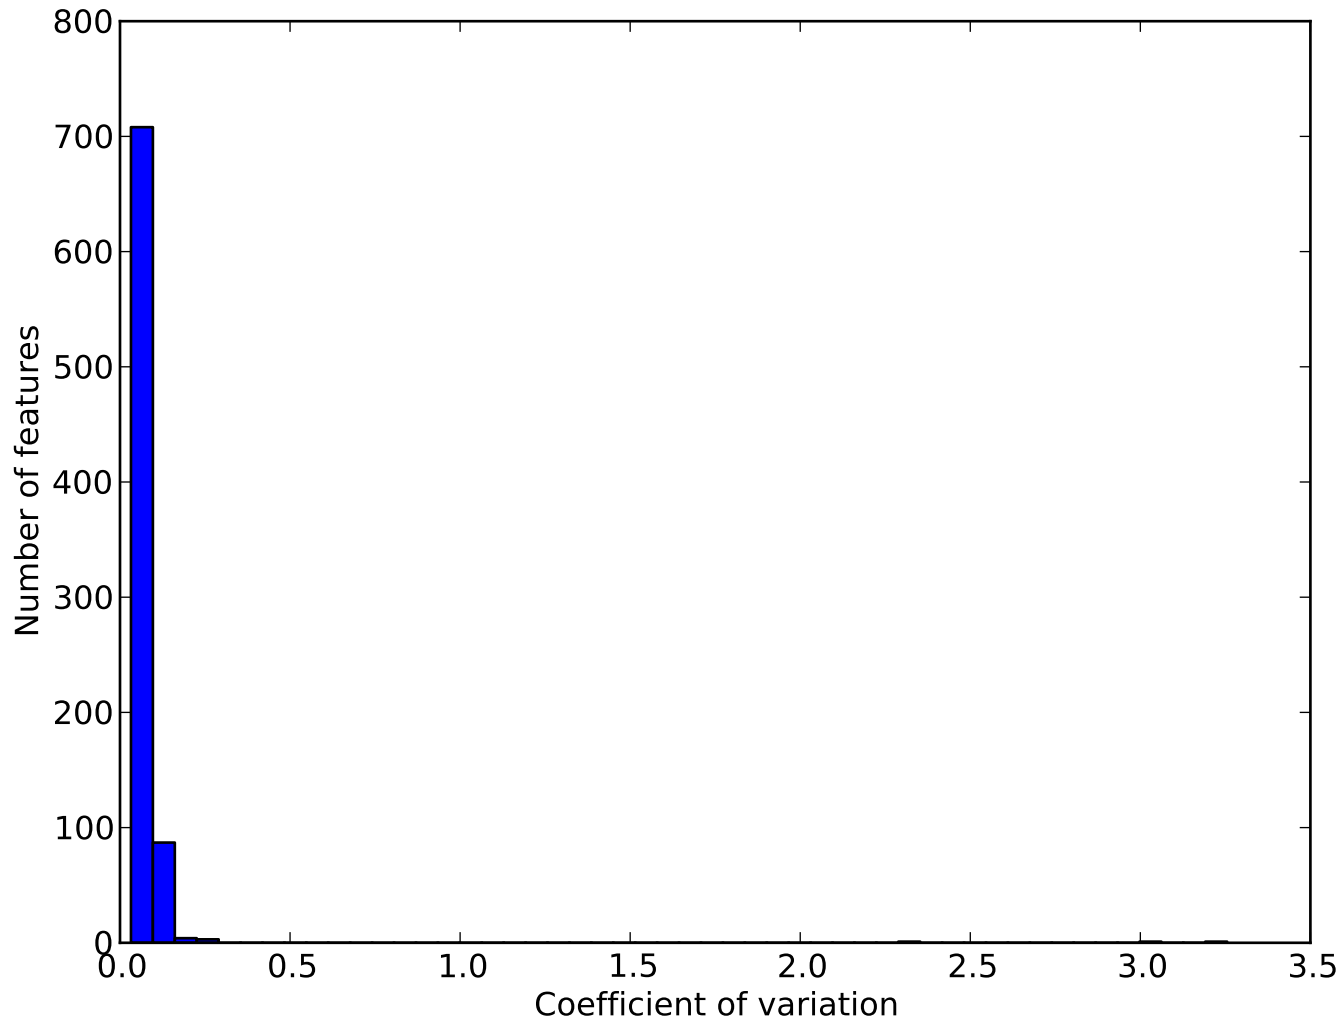

Supplement: pone.0080999.s007.pdf [file pone.0080999.s007.pdf]
